# Supplementary material for: Financial Conflicts of Interest in Clinical Practice Guidelines: A Systematic Review
Source: PubMed Central journal article supplement — Mayo Clin Proc Innov Qual Outcomes. 2021 Jan 19;5(2):466–75. doi: 10.1016/j.mayocpiqo.2020.09.016 (PMC8105509; doi:10.1016/j.mayocpiqo.2020.09.016), 2021-01-19
Supplement: mmc1.pdf [file mmc1.pdf]

Table S1. Search Strategy

Ovid MEDLINE(R) and Ovid OLDMEDLINE(R) 1980 to March, Week 1, 2019

| #  | Searches                                                                                                                    |
|----|-----------------------------------------------------------------------------------------------------------------------------|
| 1  | “Conflict of Interest” [MeSH]                                                                                               |
| 2  | (conflict n3 interest) [title, original title, abstract, name of substance word, subject heading word, unique identifier]   |
| 3  | Drug Industry [Ethics, Legislation & Jurisprudence]                                                                         |
| 4  | Research Support as Topic [Ethics, Legislation & Jurisprudence, Standards]                                                  |
| 5  | guidelines as topic                                                                                                         |
| 6  | (practice n3 guideline) [ title, original title, abstract, name of substance word, subject heading word, unique identifier] |
| 7  | (clinical n3 guideline) [title, original title, abstract, name of substance word, subject heading word, unique identifier]  |
| 8  | #1 OR #2 OR #3 OR #4                                                                                                        |
| 9  | #5 OR #6 OR #7                                                                                                              |
| 10 | #8 AND #9                                                                                                                   |
| 11 | "2018/01/01"[Date - Publication] : "2018/01/01"[Date - Publication]                                                         |
| 12 | #10 AND #11                                                                                                                 |
